# Supplementary material
Source: PubMed Central journal article supplement (PMC6302944)
Supplement: jciinsight-3-123614-s100.pdf [file jciinsight-3-123614-s100.pdf]

**Elevated Circulating MMP-9 and Increased Exacerbation Risk in COPD: Results  
from SPIROMICS and COPDGene**

(Data Supplement)

J. Michael Wells<sup>1,2,3</sup>, Margaret M. Parker<sup>4</sup>, Robert A. Oster<sup>5</sup>, Russ P. Bowler<sup>6</sup>,  
Mark T. Dransfield<sup>1,2,3</sup>, Surya P. Bhatt<sup>1,2</sup>, Michael H. Cho<sup>4</sup>, Victor Kim<sup>7</sup>, Jeffrey L.  
Curtis<sup>8,9</sup>, Fernando J. Martinez<sup>10</sup>, Robert Paine III<sup>11,12</sup>, Wanda O'Neal<sup>13</sup>, Wassim W.  
Labaki<sup>8</sup>, Robert J. Kaner<sup>10</sup>, Igor Barjaktarevic<sup>14</sup>, MeiLan K. Han<sup>8</sup>,  
Edwin K. Silverman<sup>4</sup>, James D. Crapo<sup>6</sup>, R. Graham Barr<sup>15</sup>, Prescott Woodruff<sup>16</sup>, Peter J.  
Castaldi<sup>4</sup>, Amit Gaggar<sup>1,2,3</sup> for the SPIROMICS and COPDGene Investigators<sup>†</sup>

Supplemental Table 1 – Page 2

Supplemental Table 2 – Page 3

Supplemental Table 3 – Page 4

Supplemental Table 4 – Page 5

Supplemental Figure 1 – Page 6

Supplemental Figure 2 – Page 7

Supplemental Acknowledgements – Page 8

**Supplemental Table 1. Unadjusted associations with prospective COPD exacerbations using logistic regression models**

|                                      | SPIROMICS |              |         | COPDGene |              |         |
|--------------------------------------|-----------|--------------|---------|----------|--------------|---------|
|                                      | OR        | 95% CI       | P-value | OR       | 95% CI       | P-value |
| Age, years                           | 0.97      | 0.96 – 0.99  | <0.001  | 0.99     | 0.95 – 1.04  | 0.67    |
| White race                           | 0.96      | 0.69 – 1.32  | 0.79    |          |              |         |
| Male sex                             | 0.70      | 0.54 – 0.89  | 0.004   | 0.73     | 0.34 – 1.57  | 0.42    |
| BMI, kg/m <sup>2</sup>               | 0.99      | 0.97 – 1.01  | 0.23    | 1.00     | 0.94 – 1.07  | 0.91    |
| FEV <sub>1</sub> , percent predicted | 0.97      | 0.96 – 0.98  | <0.001  | 1.01     | 0.99 – 1.03  | 0.45    |
| FVC, percent predicted               | 0.98      | 0.97 – 0.99  | <0.001  | 1.01     | 0.99 – 1.03  | 0.48    |
| FEV1/FVC                             | 0.01      | 0.003 – 0.02 | <0.001  | 1.93     | 0.09 – 42.63 | 0.68    |
| Current smoker                       | 0.89      | 0.69 – 1.16  | 0.39    | 0.90     | 0.35 – 2.40  | 0.85    |
| Pack-year history                    | 1.00      | 1.00 – 1.01  | 0.27    | 0.99     | 0.97 – 1.00  | 0.032   |
| Chronic bronchitis                   | 3.13      | 2.31 – 4.22  | <0.001  | 1.23     | 0.50 – 3.04  | 0.65    |
| WBC, x10 <sup>9</sup> cell/ml        | 1.07      | 1.10 – 1.13  | 0.025   | 0.92     | 0.78 – 1.09  | 0.34    |
| Serum Neutrophil %                   | 1.02      | 1.00 – 1.03  | 0.020   | 1.00     | 0.96 – 1.04  | 0.95    |
| Serum Eosinophil %                   | 0.97      | 0.91 – 1.02  | 0.25    | 1.05     | 0.85 – 1.29  | 0.65    |
| Any AECOPD within previous 12 months | 3.37      | 2.53 – 4.51  | <0.001  | 2.36     | 1.08 – 5.14  | 0.031   |
| Elevated MMP-9                       | 1.92      | 1.23 – 2.99  | 0.004   | 2.13     | 0.85 – 5.37  | 0.108   |
| TIMP-1, ng/ml                        | 1.00      | 0.99 – 1.01  | 0.60    | 1.01     | 0.98 – 1.04  | 0.48    |

Data represented as odds ratio (OR) along with its corresponding 95% confidence interval (CI). Unadjusted logistic regression models were used to obtain these results. Abbreviations BMI = body mass index; FEV<sub>1</sub> = forced expiratory volume in 1-second; FVC = forced vital capacity; WBC = white blood cell count; AECOPD = acute exacerbation of COPD; MMP-9 = matrix metalloprotease 9

**Supplemental Table 2. Associations with prospective COPD exacerbations**

|                                      | Multivariable Model (SPIROMICS) |             |         | Multivariable Model (COPDGene) |             |         |
|--------------------------------------|---------------------------------|-------------|---------|--------------------------------|-------------|---------|
|                                      | OR                              | 95% CI      | P-value | OR                             | 95% CI      | P-value |
| Age, years                           | 0.98                            | 0.97 – 1.00 | 0.12    | 1.00                           | 0.94 – 1.05 | 0.85    |
| White race                           | 0.96                            | 0.65 – 1.40 | 0.82    | --                             | --          | --      |
| Male sex                             | 0.74                            | 0.56 – 0.99 | 0.041   | 0.88                           | 0.38 – 1.03 | 0.77    |
| FEV <sub>1</sub> , percent predicted | 0.98                            | 0.97 – 0.98 | <0.001  | 1.01                           | 0.98 – 1.03 | 0.63    |
| Current smoker                       | 0.85                            | 0.61 – 1.17 | 0.31    | 0.58                           | 0.17 – 2.07 | 0.41    |
| Chronic Bronchitis                   | 1.88                            | 1.35 – 2.62 | <0.001  | 1.30                           | 0.44 – 3.79 | 0.64    |
| WBC, x 10 <sup>9</sup> cell/ml       | 1.01                            | 0.94 – 1.08 | 0.88    | 0.81                           | 0.65 – 1.00 | 0.052   |
| Any AECOPD within previous 12 months | 2.13                            | 1.52 – 3.00 | <0.001  | 2.62                           | 1.11 – 6.15 | 0.027   |
| Elevated MMP-9                       | 1.71                            | 1.00 – 2.90 | 0.049   | 3.03                           | 1.02 – 9.01 | 0.046   |

Results are obtained from multivariable logistic regression models. OR=odds ratio, CI=confidence interval. For SPIROMICS, Nagelkerke R<sup>2</sup> = 0.228; for COPDGene, Nagelkerke R<sup>2</sup> = 0.128.

**Supplemental Table 3. Associations with AECOPD Frequency**

|                                      | Multivariable Model (SPIROMICS) |             |         | Multivariable Model (COPDGene) |             |         |
|--------------------------------------|---------------------------------|-------------|---------|--------------------------------|-------------|---------|
|                                      | IRR                             | 95% CI      | P-value | IRR                            | 95% CI      | P-value |
| Age, years                           | 0.98                            | 0.97 – 0.99 | <0.001  | 0.99                           | 0.98 – 1.00 | 0.005   |
| White race                           | 0.93                            | 0.81 – 1.07 | 0.27    | --                             | --          | --      |
| Male sex                             | 0.65                            | 0.59 – 0.73 | <0.001  | 0.91                           | 0.77 – 1.06 | 0.23    |
| FEV <sub>1</sub> , percent predicted | 0.98                            | 0.98 – 0.99 | <0.001  | 1.00                           | 1.00 – 1.01 | 0.35    |
| Current smoker                       | 0.94                            | 0.83 – 1.07 | 0.35    | 0.88                           | 0.70 – 1.12 | 0.30    |
| Chronic Bronchitis                   | 1.36                            | 1.22 – 1.52 | <0.001  | 0.92                           | 0.76 – 1.12 | 0.42    |
| WBC, x 10 <sup>9</sup> cell/ml       | 0.99                            | 0.97 – 1.01 | 0.40    | 1.01                           | 0.97 – 1.05 | 0.75    |
| Any AECOPD within previous 12 months | 2.00                            | 1.78 – 2.23 | <0.001  | 2.67                           | 1.22 – 3.21 | <0.001  |
| Elevated MMP-9                       | 1.45                            | 1.23 – 1.71 | <0.001  | 1.24                           | 1.03 – 1.49 | 0.024   |

Results are obtained from multivariable Poisson regression models. IRR=incidence rate ratio, CI=confidence interval.

**Supplemental Table 4. Unadjusted associations with COPD exacerbation frequency using Poisson models**

|                                      | SPIROMICS |           |         | COPDGene |           |         |
|--------------------------------------|-----------|-----------|---------|----------|-----------|---------|
|                                      | IRR       | 95% CI    | P-value | IRR      | 95% CI    | P-value |
| Age, years                           | 0.96      | 0.96-0.97 | <0.001  | 0.97     | 0.97-0.99 | <0.001  |
| White race                           | 0.87      | 0.77-0.99 | 0.029   |          |           |         |
| Male sex                             | 0.61      | 0.55-0.67 | <0.001  | 0.84     | 0.72-0.98 | 0.024   |
| BMI, kg/m <sup>2</sup>               | 1.00      | 0.99-1.01 | 0.58    | 1.00     | 0.98-1.01 | 0.56    |
| FEV <sub>1</sub> , percent predicted | 0.98      | 0.97-0.98 | <0.001  | 1.00     | 1.00-1.01 | 0.32    |
| FVC, percent predicted               | 0.98      | 0.98-0.98 | <0.001  | 1.00     | 1.00-1.00 | 0.64    |
| FEV1/FVC                             | 0.05      | 0.03-0.07 | <0.001  | 1.67     | 0.88-3.17 | 0.11    |
| Current smoker                       | 0.98      | 0.88-1.09 | 0.70    | 1.19     | 0.98-1.45 | 0.077   |
| Pack-year history                    | 1.00      | 1.00-1.00 | 0.012   | 0.99     | 0.99-1.00 | <0.001  |
| Chronic bronchitis                   | 2.24      | 2.02-2.48 | <0.001  | 1.10     | 0.92-1.31 | 0.30    |
| WBC, x10 <sup>9</sup> cell/ml        | 1.04      | 1.03-1.07 | <0.001  | 1.07     | 1.03-1.11 | <0.001  |
| Serum Neutrophil %                   | 1.01      | 1.00-1.01 | <0.001  | 1.02     | 1.02-1.03 | <0.001  |
| Serum Eosinophil %                   | 0.99      | 0.96-1.01 | 0.22    | 0.91     | 0.87-0.95 | <0.001  |
| Any AECOPD within previous 12 months | 3.11      | 2.82-3.43 | <0.001  | 2.87     | 2.40-3.42 | <0.001  |
| Elevated MMP-9                       | 1.45      | 1.26-1.67 | <0.001  | 1.43     | 1.23-1.68 | <0.001  |
| TIMP-1, ng/ml                        | 1.00      | 1.00-1.00 | 0.078   | 0.99     | 0.99-1.01 | 0.64    |

Data represented as incidence rate ratio (IRR) along with its corresponding 95% confidence interval (CI). Unadjusted Poisson regression models were used to obtain these results. Abbreviations BMI = body mass index; FEV<sub>1</sub> = forced expiratory volume in 1-second; FVC = forced vital capacity; WBC = white blood cell count; AECOPD = acute exacerbation of COPD; MMP-9 = matrix metalloproteinase 9

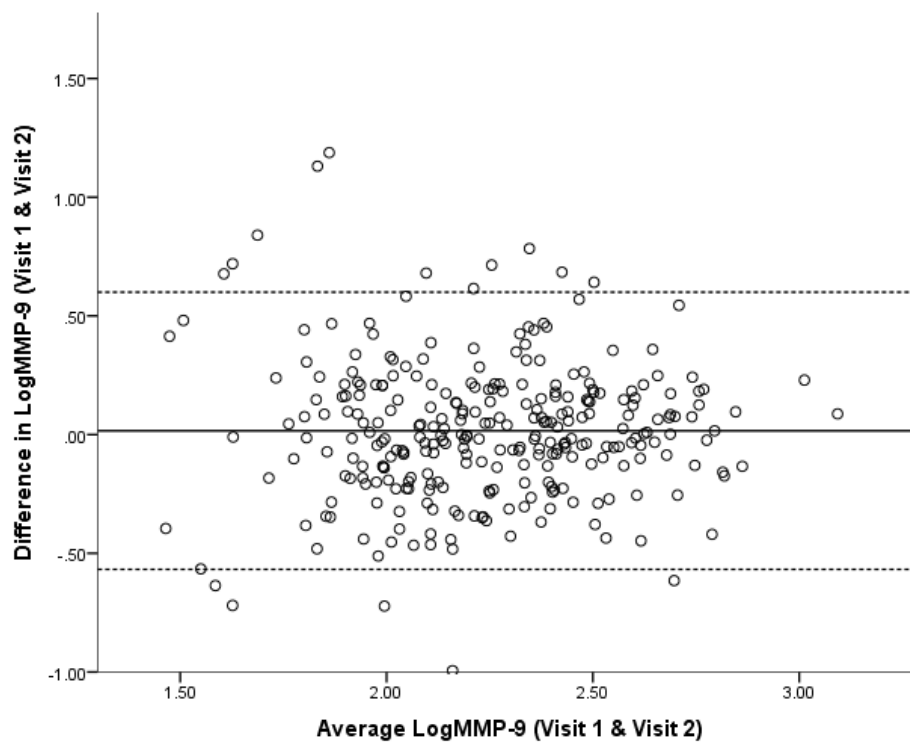

**Supplemental Figure 1.** Bland-Altman Plot for plasma logMMP-9 values at Visit 1 and Visit 2 in SPIROMICS. The solid horizontal line represents the mean of the two values and dashed horizontal lines represent the 95%CI boundaries. The coefficient of variation of the logMMP-9 was 14.7% for Visit 1 and 14.8% for Visit 2. Cohen's kappa was 0.44 ( $P < 0.001$ ) for elevated MMP-9 at visit 1 and visit 2, suggesting moderate agreement between the two timepoints.

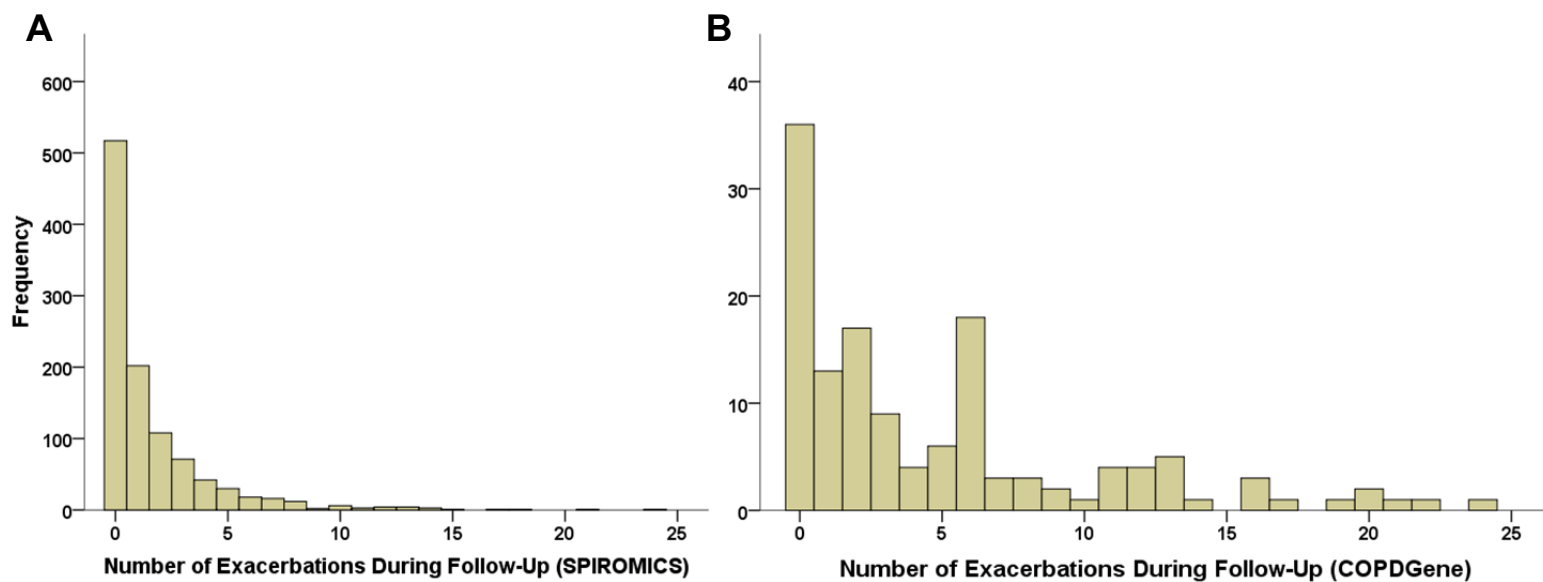

**Supplemental Figure 2.** Histogram for exacerbations during longitudinal follow-up in (A) SPIROMICS and (B) COPDGene.

## **Supplemental Acknowledgements (Consortia)**

### **SPIROMICS Investigators:**

Neil E. Alexis, Ph.D.; Wayne H. Anderson, Ph.D.; R. Graham Barr, M.D., Dr.P.H.; Eugene R. Bleecker, M.D.; Richard C. Boucher, M.D.; Russell P. Bowler, M.D., Ph.D.; Elizabeth E. Carretta, M.P.H.; Stephanie A. Christenson, M.D.; Alejandro P. Comellas, M.D.; Christopher B. Cooper, M.D., Ph.D.; David J. Couper, Ph.D.; Gerard J. Criner, M.D.; Ronald G. Crystal, M.D.; Jeffrey L. Curtis, M.D.; Claire M. Doerschuk, M.D.; Mark T. Dransfield, M.D.; Christine M. Freeman, Ph.D.; MeiLan K. Han, M.D., M.S.; Nadia N. Hansel, M.D., M.P.H.; Annette T. Hastie, Ph.D.; Eric A. Hoffman, Ph.D.; Robert J. Kaner, M.D.; Richard E. Kanner, M.D.; Eric C. Kleerup, M.D.; Jerry A. Krishnan, M.D., Ph.D.; Lisa M. LaVange, Ph.D.; Stephen C. Lazarus, M.D.; Fernando J. Martinez, M.D., M.S.; Deborah A. Meyers, Ph.D.; John D. Newell, Jr., M.D.; Elizabeth C. Oelsner, M.D., M.P.H.; Wanda K. O'Neal, Ph.D.; Robert Paine III, M.D.; Nirupama Putcha, M.D., M.H.S.; Stephen I. Rennard, M.D.; Donald P. Tashkin, M.D.; Mary Beth Scholand, M.D.; J. Michael Wells, M.D.; Robert A. Wise, M.D.; and Prescott G. Woodruff, M.D., M.P.H.

### **COPDGene Investigators:**

#### **Core Units**

*Administrative Center:* James D. Crapo, MD (PI); Edwin K. Silverman, MD, PhD (PI); Barry J. Make, MD; Elizabeth A. Regan, MD, PhD

*Genetic Analysis Center:* Terri Beaty, PhD; Ferdouse Begum, PhD; Robert Busch, MD; Peter J. Castaldi, MD, MSc; Michael Cho, MD; Dawn L. DeMeo, MD, MPH; Adel R. Boueiz, MD; Marilyn G. Foreman, MD, MS; Eitan Halper-Stromberg; Nadia N. Hansel, MD, MPH; Megan E. Hardin, MD; Lystra P. Hayden, MD, MMSc; Craig P.



Hersh, MD, MPH; Jacqueline Hetmanski, MS, MPH; Brian D. Hobbs, MD; John E. Hokanson, MPH, PhD; Nan Laird, PhD; Christoph Lange, PhD; Sharon M. Lutz, PhD; Merry-Lynn McDonald, PhD; Margaret M. Parker, PhD; Dandi Qiao, PhD; Elizabeth A. Regan, MD, PhD; Stephanie Santorico, PhD; Edwin K. Silverman, MD, PhD; Emily S. Wan, MD; Sungho Won

*Imaging Center:* Mustafa Al Qaisi, MD; Harvey O. Coxson, PhD; Teresa Gray; MeiLan K. Han, MD, MS; Eric A. Hoffman, PhD; Stephen Humphries, PhD; Francine L. Jacobson, MD, MPH; Philip F. Judy, PhD; Ella A. Kazerooni, MD; Alex Kluiber; David A. Lynch, MB; John D. Newell, Jr., MD; Elizabeth A. Regan, MD, PhD; James C. Ross, PhD; Raul San Jose Estepar, PhD; Joyce Schroeder, MD; Jered Sieren; Douglas Stinson; Berend C. Stoel, PhD; Juerg Tschirren, PhD; Edwin Van Beek, MD, PhD; Bram van Ginneken, PhD; Eva van Rikxoort, PhD; George Washko, MD; Carla G. Wilson, MS;

*PFT QA Center, Salt Lake City, UT:* Robert Jensen, PhD

*Data Coordinating Center and Biostatistics, National Jewish Health, Denver, CO:* Douglas Everett, PhD; Jim Crooks, PhD; Camille Moore, PhD; Matt Strand, PhD; Carla G. Wilson, MS

*Epidemiology Core, University of Colorado Anschutz Medical Campus, Aurora, CO:* John E. Hokanson, MPH, PhD; John Hughes, PhD; Gregory Kinney, MPH, PhD; Sharon M. Lutz, PhD; Katherine Pratte, MSPH; Kendra A. Young, PhD

### **Clinical Centers**

*Ann Arbor VA:* Jeffrey L. Curtis, MD; Carlos H. Martinez, MD, MPH; Perry G. Pernicano, MD

*Baylor College of Medicine, Houston, TX:* Nicola Hanania, MD, MS; Philip Alapat, MD; Mustafa Atik, MD; Venkata Bandi, MD; Aladin Boriek, PhD; Kalpatha Guntupalli, MD; Elizabeth Guy, MD; Arun Nachiappan, MD; Amit Parulekar, MD;

*Brigham and Women's Hospital, Boston, MA:* Dawn L. DeMeo, MD, MPH; Craig Hersh, MD, MPH; Francine L. Jacobson, MD, MPH; George Washko, MD

*Columbia University, New York, NY:* R. Graham Barr, MD, DrPH; John Austin, MD; Belinda D'Souza, MD; Gregory D.N. Pearson, MD; Anna Rozenshtein, MD, MPH, FACR; Byron Thomashow, MD

*Duke University Medical Center, Durham, NC:* Neil MacIntyre, Jr., MD; H. Page McAdams, MD; Lacey Washington, MD

*HealthPartners Research Institute, Minneapolis, MN:* Charlene McEvoy, MD, MPH; Joseph Tashjian, MD

*Johns Hopkins University, Baltimore, MD:* Robert Wise, MD; Robert Brown, MD; Nadia N. Hansel, MD, MPH; Karen Horton, MD; Allison Lambert, MD, MHS; Nirupama Putcha, MD, MHS

*Los Angeles Biomedical Research Institute at Harbor UCLA Medical Center, Torrance, CA:* Richard Casaburi, PhD, MD; Alessandra Adami, PhD; Matthew Budoff,

MD; Hans Fischer, MD; Janos Porszasz, MD, PhD; Harry Rossiter, PhD; William Stringer, MD

*Michael E. DeBakey VAMC, Houston, TX:* Amir Sharafkhaneh, MD, PhD; Charlie Lan, DO

*Minneapolis VA:* Christine Wendt, MD; Brian Bell, MD

*Morehouse School of Medicine, Atlanta, GA:* Marilyn G. Foreman, MD, MS; Eugene Berkowitz, MD, PhD; Gloria Westney, MD, MS

*National Jewish Health, Denver, CO:* Russell Bowler, MD, PhD; David A. Lynch, MB

*Reliant Medical Group, Worcester, MA:* Richard Rosiello, MD; David Pace, MD

*Temple University, Philadelphia, PA:* Gerard Criner, MD; David Ciccolella, MD; Francis Cordova, MD; Chandra Dass, MD; Gilbert D'Alonzo, DO; Parag Desai, MD; Michael Jacobs, PharmD; Steven Kelsen, MD, PhD; Victor Kim, MD; A. James Mamary, MD; Nathaniel Marchetti, DO; Aditi Satti, MD; Kartik Shenoy, MD; Robert M. Steiner, MD; Alex Swift, MD; Irene Swift, MD; Maria Elena Vega-Sanchez, MD

*University of Alabama, Birmingham, AL:* Mark Dransfield, MD; William Bailey, MD; Surya Bhatt, MD; Anand Iyer, MD; Hrudaya Nath, MD; J. Michael Wells, MD

*University of California, San Diego, CA:* Joe Ramsdell, MD; Paul Friedman, MD; Xavier Soler, MD, PhD; Andrew Yen, MD

*University of Iowa, Iowa City, IA:* Alejandro P. Comellas, MD; John Newell, Jr., MD; Brad Thompson, MD

*University of Michigan, Ann Arbor, MI:* MeiLan K. Han, MD, MS; Ella Kazerooni, MD; Carlos H. Martinez, MD, MPH

*University of Minnesota, Minneapolis, MN:* Joanne Billings, MD; Abbie Begnaud, MD; Tadashi Allen, MD

*University of Pittsburgh, Pittsburgh, PA:* Frank Scirba, MD; Jessica Bon, MD; Divay Chandra, MD, MSc; Carl Fuhrman, MD; Joel Weissfeld, MD, MPH

*University of Texas Health Science Center at San Antonio, San Antonio, TX:* Antonio Anzueto, MD; Sandra Adams, MD; Diego Maselli-Caceres, MD; Mario E. Ruiz, MD
